# Supplementary material for: Which outcomes are most important to measure in patients with COVID-19 and how and when should these be measured? Development of an international standard set of outcomes measures for clinical use in patients with COVID-19: a report of the International Consortium for Health Outcomes Measurement (ICHOM) COVID-19 Working Group
Source: PubMed Central journal article supplement — BMJ Open. 2021 Nov 15;11(11):e051065. doi: 10.1136/bmjopen-2021-051065 (PMC8593274; doi:10.1136/bmjopen-2021-051065), 2021-11-15
Supplement: bmjopen-2021-051065supp001.pdf [file bmjopen-2021-051065supp001.pdf]

18/06/2021

Qualtrics Survey Software

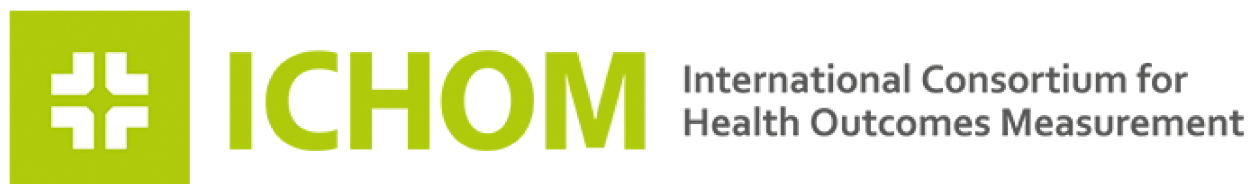

## Default Question Block

Dear Participant,

The International Consortium for Health Outcomes Measurement (ICHOM, [www.ichom.org](http://www.ichom.org)) is an independent not-for-profit organisation. We are launching a project which aims to create a measurement set to be used by clinicians to assess the health of patients who have had COVID-19 by focusing on the outcomes that patients feel are important.

To help us better understand, we are asking people who have had COVID-19 to complete the short survey below, asking what matters most to them.

It should take no longer than 5 minutes to complete and yet it can change the way healthcare professionals manage the care of patients recovering from COVID-19. Your feedback will be invaluable.

**Please note** that answering this survey is on a voluntary basis, your responses will remain anonymous and no IP or personal data are recorded.

As of today, are you aged 18 years of age or older?

- Yes  
 No

Thank you for your interest in this project. Unfortunately, you must be 18 years of age or older in order to participate in this survey.

1. From this list below, please give feedback on how important the following health outcomes are to patients recovering from COVID-19. These outcomes are grouped into domains (highlighted in bold) which we would also like you to rate.

| <b>1-3= Not important</b> <b>4-6= Nice to have</b> <b>7-9= Essential to have</b> |   |   |   |   |   |   |   |
|----------------------------------------------------------------------------------|---|---|---|---|---|---|---|
| 1                                                                                | 2 | 3 | 4 | 5 | 6 | 7 | 8 |

18/06/2021

Qualtrics Survey Software

1-3= Not important 4-6= Nice to have 7-9= Essential to have

|                                                                                                     | 1                     | 2                     | 3                     | 4                     | 5                     | 6                     | 7                     | 8                     |
|-----------------------------------------------------------------------------------------------------|-----------------------|-----------------------|-----------------------|-----------------------|-----------------------|-----------------------|-----------------------|-----------------------|
| <b>Physical Functioning</b>                                                                         | <input type="radio"/> |
| Pain as a chronic condition that affects day-to-day life                                            | <input type="radio"/> |
| Presence of a chronic cough                                                                         | <input type="radio"/> |
| Shortness of breath                                                                                 | <input type="radio"/> |
| Fatigue and vitality                                                                                | <input type="radio"/> |
| Ability to exercise                                                                                 | <input type="radio"/> |
| Speech and communication                                                                            | <input type="radio"/> |
| Health-related quality of life (ie an individual's perceived physical health over time)             | <input type="radio"/> |
| <b>Mental Functioning</b>                                                                           | <input type="radio"/> |
| Emotional wellbeing                                                                                 | <input type="radio"/> |
| Depression                                                                                          | <input type="radio"/> |
| Anxiety                                                                                             | <input type="radio"/> |
| <b>Social Functioning</b>                                                                           | <input type="radio"/> |
| Feelings of loneliness and isolation                                                                | <input type="radio"/> |
| Feeling able to return to work                                                                      | <input type="radio"/> |
| Productivity and how health issues impact daily activities in and out of work                       | <input type="radio"/> |
| <b>Clinical Outcomes</b>                                                                            | <input type="radio"/> |
| Survival                                                                                            | <input type="radio"/> |
| Whether any admission to a hospital was required, the length of stay and any subsequent readmission | <input type="radio"/> |
| Required use of a ventilator                                                                        | <input type="radio"/> |
| Required any surgical intervention                                                                  | <input type="radio"/> |

Do you feel that this list broadly captures all the important outcomes that matter most to patients recovering from COVID-19?

- Yes
- No

18/06/2021

Qualtrics Survey Software

Which additional outcomes would you include? Please list these in the box below with a brief explanation of each.

Thank you for completing this survey. If you have any questions or would like further information on this work, please do not hesitate to contact us using the email address below. Please click the grey arrow on the right-hand side below to finish the survey and submit your answers.

Nick Sillett

[n.sillett@ichom.org](mailto:n.sillett@ichom.org)

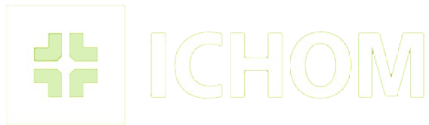

Powered by Qualtrics
